# Supplementary material for: Linking surface coverage with surfactant activity to refine the role of surfactants for air-sea gas exchange
Source: Copernicus journal article supplement (doi:10.5194/egusphere-2025-5276), 2026-01-19
Supplement: Supplementary file 1 [file egusphere-2025-5276-supplement.pdf]

## Supporting Information

### Linking surface coverage with surfactant activity to refine the role of surfactants for air-sea gas exchange

Falko Asmussen-Schäfer,<sup>1</sup> Mariana Ribas-Ribas,<sup>2</sup> Oliver Wurl,<sup>2</sup> Gernot Friedrichs,<sup>1,3</sup>

<sup>1</sup>*Institute of Physical Chemistry, Christian-Albrechts-University Kiel, 24118 Kiel, Germany*

<sup>2</sup>*Institute for Chemistry and Biology of the Marine Environment (ICBM), Carl von Ossietzky University of Oldenburg, Oldenburg, Germany*

<sup>3</sup>*Kiel Marine Science-Centre for Interdisciplinary Marine Sciences, Christian-Albrechts-University Kiel, 24098 Kiel, Germany*

## Contents

### A. Comparison of VSFG spectral trends

Figure S1: VSFG intensity trends

### B. Surface coverage / surfactant activity data

Table S1: SURF mesocosm study 2023.

Table S2: Helgoland field campaign 2024.

### C. Global surface coverage estimate

Figure S2: Global maps of primary production by seasons.

Figure S3: Trophic classification by seasons.

Table S3: Mean primary production per trophic zone.

Figure S4: Surface activity - primary production correlation.

Figure S5: Global maps of surface activity by seasons.

Figure S6: Global maps of surface coverage by seasons.

## A. Comparison of VSFG spectral trends

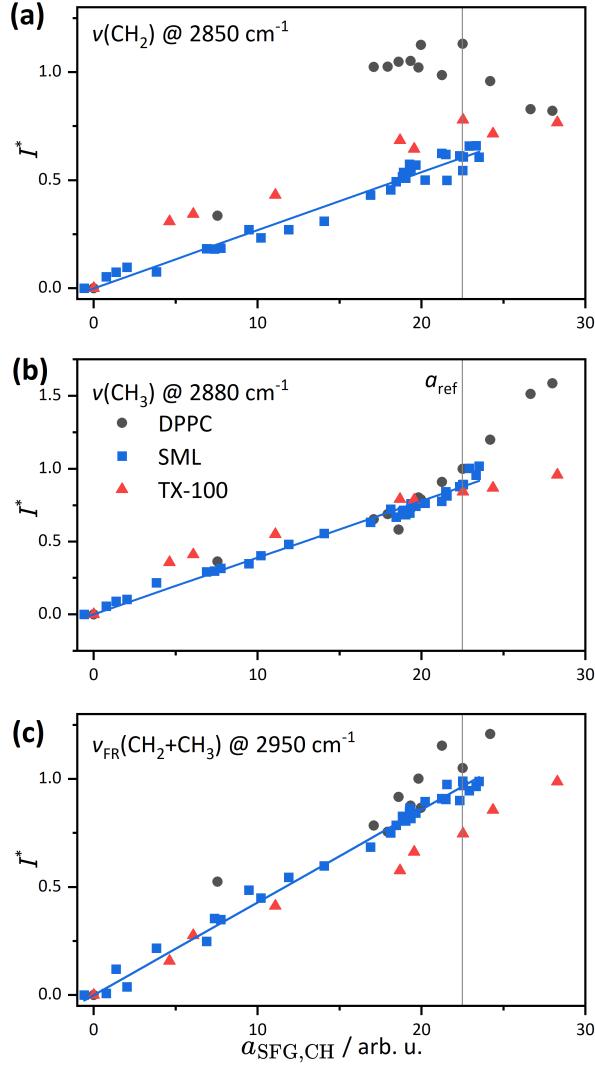

Figure S1: VSFG spectral trends. a)  $\text{CH}_2$ , b)  $\text{CH}_3$ , and c) Fermi resonance peaks in the VSFG spectra of SML, DPPC, and TX-100 samples.

In order to compare the spectral trends for different samples (SML, DPPC, TX-100), relative signal intensities  $I^*$  were calculated as follows:

$$I^* = \frac{\sqrt{I_i} - \sqrt{I_{\text{H}_2\text{O}}}}{\sqrt{I_{\text{CH}_3}(a_{\text{SFG-CH, ref.}}) - \sqrt{I_{\text{H}_2\text{O}}}}}$$

Here, the (water background-corrected) peak intensity values were arbitrarily normalized to the  $\text{CH}_3$  peak intensity corresponding the VSFG spectrum of the DPPC reference point (see main paper Fig. 5,  $\Pi = 4 \text{ mN m}^{-1}$ ). Figure S1 shows the the intensity trends for the three main vibrational bands of the symmetric C-H stretch vibrations of  $\text{CH}_2$  (panel a) and  $\text{CH}_3$  (panel b) as well as their corresponding Fermi resonance band (panel c) as function of the overall integrated

C-H stretch spectral intensity  $a_{\text{SFG-CH}}$ . In these plots, a linear dependence indicates that the corresponding relative peak contribution to the overall spectrum remains constant. For the SML samples, a linear correlation is obtained for all three vibrations, hence indicating that the overall spectral shape remains unchanged. This linear trend supports our assumption that a linear scaling of the surface coverage index  $sc$  as a function of the (rooted) VSFG spectral intensity according to Eqs. 2 and 3 is reasonable.

In contrast, distinct spectral changes are seen for DPPC. For example, toward higher spectral intensity, the  $I^*$  values of the  $\nu(\text{CH}_2)$  peak remain nearly constant or even slightly decrease at the highest plotted  $a_{\text{SFG-CH}}$  values. Instead, the intensity of the  $\nu(\text{CH}_3)$  band rises disproportionately, resulting in a much stronger contribution of the  $\nu(\text{CH}_3)$  band to the overall integrated spectral intensity. As discussed in the main text, this is due to the structural alignment of the alkyl chains at high DPPC surface concentrations, causing a pronounced surface concentration dependence of the underlying hyperpolarizability  $\beta(N)$  in Eq. 1.

TX-100 exhibits an intermediate characteristics. Compared to DPPC, the non-linearities are much less pronounced, but a leveling-off of the signal contributions from the  $\nu(\text{CH}_2)$  and  $\nu(\text{CH}_2)$  bands is clearly visible. As discussed in the main text and as seen in Fig. 4, this is due to the prominent band at  $2915 \text{ cm}^{-1}$ , which we have assigned to the antisymmetric stretch vibration of the methylene group.

## B. Surface coverage data

Table S1: SURF mesocosm study 2023: Mean surface coverage and SML surfactant activity. Data are also available in PANGAEA [2], and have been discussed previously in the context of biological drivers for surfactant formation in Bibi et al. [1].

| Date   | surface coverage<br>/ % | SAS<br>/ $\mu\text{g Teq L}^{-1}$ | Date   | surface coverage<br>/ % | SAS<br>/ $\mu\text{g Teq L}^{-1}$ |
|--------|-------------------------|-----------------------------------|--------|-------------------------|-----------------------------------|
| May 17 | 3.4 $\pm$ 4.5           | 1376 $\pm$ 145                    | Jun 01 | 84.6 $\pm$ 10.5         | 522 $\pm$ 45                      |
| May 18 | 6.1 $\pm$ 4.9           | 499 $\pm$ 45                      | Jun 02 | 99.2 $\pm$ 11.3         | 1445 $\pm$ 52                     |
| May 19 | -2.6 $\pm$ 5.7          | 191 $\pm$ 10                      | Jun 03 | 89.9 $\pm$ 10.7         | 445 $\pm$ 44                      |
| May 20 | 42.1 $\pm$ 7.2          | 90 $\pm$ 6                        | Jun 04 | 84.0 $\pm$ 9.7          | 1963 $\pm$ 71                     |
| May 21 | 17.0 $\pm$ 4.9          | 138 $\pm$ 7                       | Jun 05 | 86.0 $\pm$ 10.0         | 1868 $\pm$ 56                     |
| May 22 | 52.8 $\pm$ 7.6          | 295 $\pm$ 13                      | Jun 06 | 85.7 $\pm$ 10.4         | 1410 $\pm$ 75                     |
| May 23 | 30.6 $\pm$ 6.9          | 138 $\pm$ 22                      | Jun 07 | 95.5 $\pm$ 10.9         | 717 $\pm$ 3                       |
| May 24 | 34.5 $\pm$ 6.4          | 294 $\pm$ 35                      | Jun 08 | 87.3 $\pm$ 10.0         | 1010 $\pm$ 25                     |
| May 25 | 32.8 $\pm$ 14.7         | 233 $\pm$ 33                      | Jun 09 | 85.6 $\pm$ 10.4         | 290 $\pm$ 18                      |
| May 26 | 9.0 $\pm$ 7.1           | 200 $\pm$ 16                      | Jun 10 | 83.7 $\pm$ 10.0         | 372 $\pm$ 26                      |
| May 27 | 45.3 $\pm$ 11.6         | 343 $\pm$ 19                      | Jun 11 | 103.7 $\pm$ 11.6        | 134 $\pm$ 7                       |
| May 28 | 62.5 $\pm$ 8.6          | 334 $\pm$ 38                      | Jun 12 | 104.5 $\pm$ 11.7        | 1179 $\pm$ 31                     |
| May 29 | 82.0 $\pm$ 9.6          | 401 $\pm$ 41                      | Jun 13 | 101.9 $\pm$ 12.1        | 341 $\pm$ 40                      |
| May 30 | 75.1 $\pm$ 10.8         | 327 $\pm$ 28                      | Jun 14 | 100.2 $\pm$ 11.3        | 1229 $\pm$ 119                    |
| May 31 | 80.5 $\pm$ 12.0         | 274 $\pm$ 22                      | Jun 15 | 100.1 $\pm$ 11.6        | 471 $\pm$ 42                      |

Table S2: Helgoland field campaign 2024: Mean surface coverage and surfactant activity data.

| Date   | surface coverage / % | SAS / $\mu\text{g Teq L}^{-1}$ | category      |
|--------|----------------------|--------------------------------|---------------|
| Jul 21 | 78.8 $\pm$ 58.2      | 79.5 $\pm$ 32.8                | SML slick     |
| Jul 27 | 129.9 $\pm$ 19.7     | 903.9 $\pm$ 24.4               | SML slick     |
| Jul 27 | 101.7 $\pm$ 64.5     | 301.3 $\pm$ 30.1               | SML slick     |
| Jul 29 | 34.1 $\pm$ 15.7      | 130.2 $\pm$ 8.7                | SML slick     |
| Jul 29 | 61.5 $\pm$ 12.8      | 86.2 $\pm$ 24.6                | SML slick     |
| Jul 18 | 46.7 $\pm$ 40.1      | 288.5 $\pm$ 24.6               | SML non-slick |
| Jul 27 | 25.3 $\pm$ 16.3      | 240.1 $\pm$ 18.8               | SML non-slick |
| Jul 27 | 76.7 $\pm$ 24.9      | 301.3 $\pm$ 30.1               | SML non-slick |
| Jul 29 | 43.8 $\pm$ 17.4      | 130.2 $\pm$ 8.7                | SML non-slick |
| Jul 29 | 65.1 $\pm$ 24.0      | 86.2 $\pm$ 24.6                | SML non-slick |
| Jul 15 | -16.1 $\pm$ 15.1     | 196.6 $\pm$ 15.9               | ULW           |
| Jul 20 | 11.4 $\pm$ 6.3       | 84.0 $\pm$ 6.4                 | ULW           |
| Jul 21 | 30.6 $\pm$ 40.6      | 58.9 $\pm$ 7.6                 | ULW           |
| Jul 27 | 52.9 $\pm$ 14.4      | 130.2 $\pm$ 13.7               | ULW           |
| Jul 29 | 23.6 $\pm$ 13.8      | 340.6 $\pm$ 38.8               | ULW           |

## C. Global surface coverage estimate

This section provides a more detailed explanation of the conceptional model for global surface coverage estimation as introduced in Section 3.4. The model links depth-integrated primary production to surfactant activity and surface coverage.

Primary production data were taken from Copernicus Marine Service [3], using the most recent data set for the year 2024 as an example. Primary production is provided as depth-integrated values by accounting for vertical layer thickness  $\Delta z_i$ ,  $PP_{\text{int}} = \sum_i PP_i \cdot \Delta z_i$ . This yields monthly or seasonally averaged depth-integrated primary production  $PP_{\text{int}}$  in units of  $\text{g C m}^{-2} \text{d}^{-1}$  (see Fig. S2).

Next, the integrated fields can be classified into three trophic zones (oligotrophic, mesotrophic, eutrophic). This allows us to use the resulting fields as an input for linking primary production to surfactant activity by adopting an empirical relationship. Wurl et al. [5] estimated the global presence of surfactants based on comprehensive surfactant activity measurements and provided the necessary data to correlate surface activity with primary production. Figure S3 illustrates the resulting, seasonally averaged global maps using threshold values of  $0.4 \text{ g m}^{-2} \text{d}^{-1}$  and  $1.2 \text{ g m}^{-2} \text{d}^{-1}$  for oligotrophic, mesotrophic, and eutrophic regimes, respectively. In principle, each trophic zone could be assigned a single mean surfactant activity (320, 502, and  $663 \mu\text{g Teq L}^{-1}$ , from Wurl et al. [5]) and a single mean surface coverage as well (65, 78 and 86 %, from our Langmuir-type correlation between surfactant activity and surface coverage). Already this simple approach reveals that expected surface coverage potential on the oceans is high, even for oligotrophic waters. However, such a simplistic approach levels out differences too much.

To better preserve the spatial resolution of the primary production dataset in the simulation, we proceeded as follows: First, the primary production data were analyzed with respect to their mean values within the three trophic zones for each month (see Table S3). As it turned out that the monthly variability was rather small, the monthly data were subsequently averaged to obtain an annual mean. Secondly, these three values were assigned to the three mean surfactant activity values from Wurl et al. [5]) and then fitted with a modified logistic saturation function with intercept (see Fig. S4) to derive a continuous correlation function between primary production and surfactant activity. The logistic-type function was chosen because (i) it reasonably represents the three data points, (ii) it can be confined to yield the lowest observed surfactant activity value of  $104 \mu\text{g Teq L}^{-1}$  at zero primary production, and (iii) it monotonically increases up to a saturation threshold, where we have used the upper  $2\sigma$  uncertainty limit of the eutrophic data reported by Wurl et al. [5]. Thirdly, this correlation function was used in combination with our Langmuir-type surfactant activity-surface coverage correlation (see Section 3.3) to predict global surfactant coverage values. Results of this procedure are shown as seasonally averaged surfactant activity maps in Fig. S5 and surface coverage potential maps in Fig. S6. The shaded areas mark regions where the mean wind speed is above  $10 \text{ m s}^{-1}$  [3, 4] and the neglect of wind may lead to higher uncertainties.

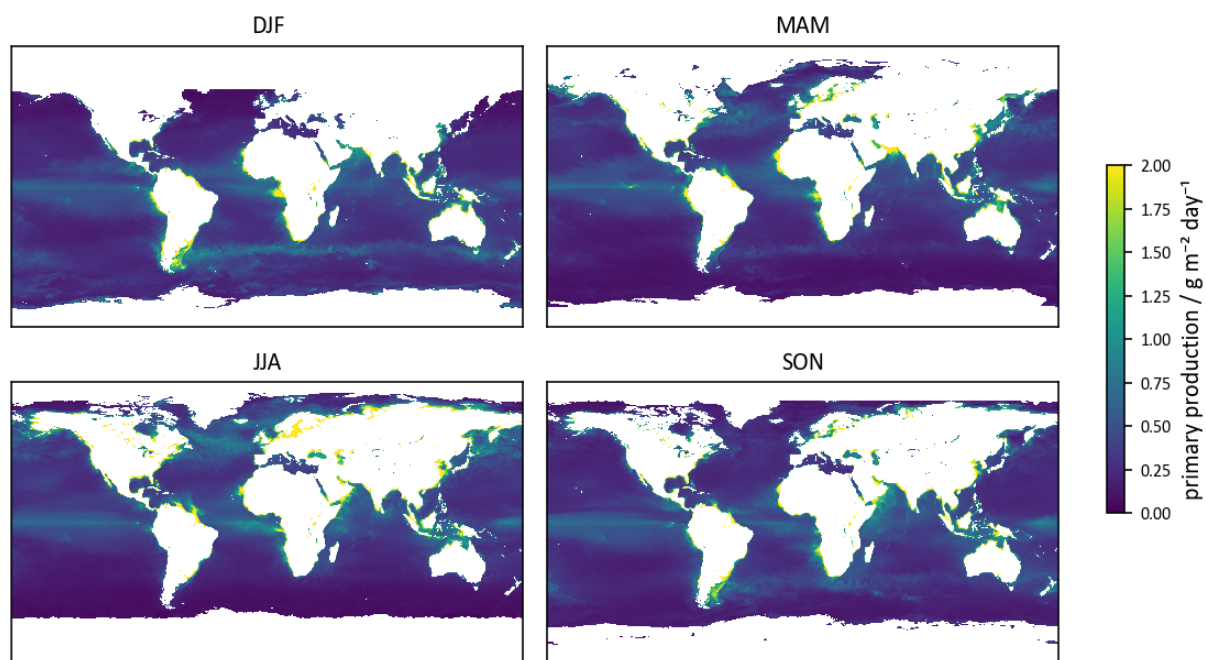

Figure S2: Global maps of primary production by seasons for 2024, based on satellite-derived data adopted from Copernicus Marine Service [3].

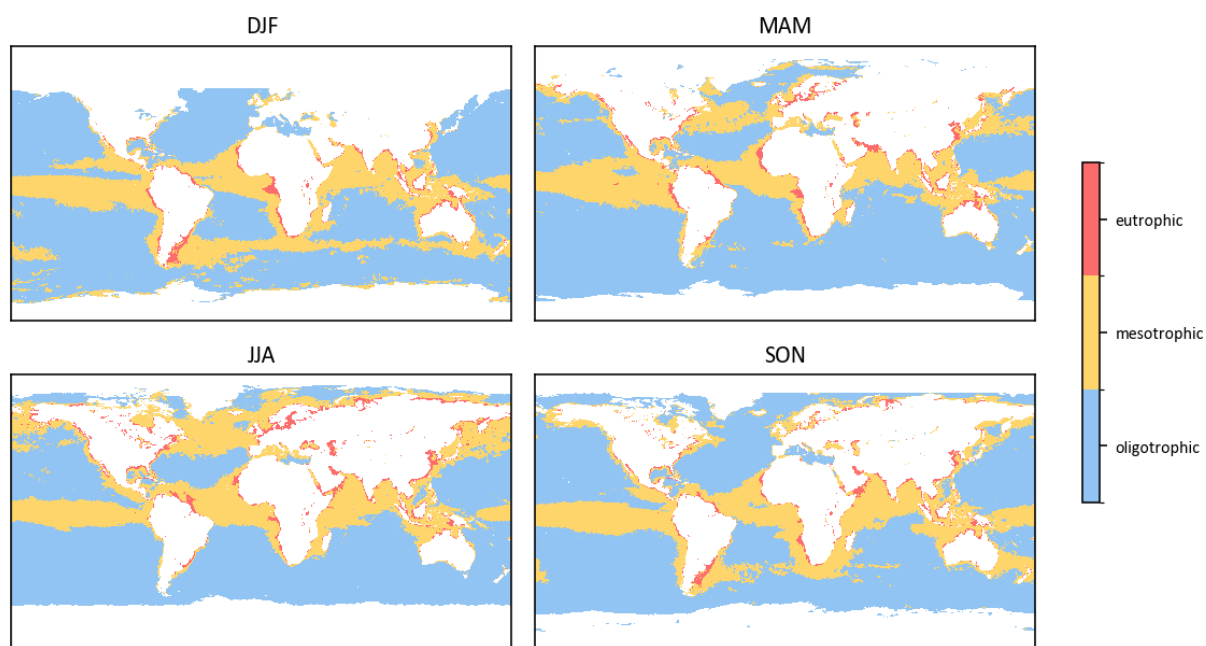

Figure S3: Trophic classification by seasons for 2024, based on primary productivity.

Table S3: Mean primary production per trophic zone for 2024.

| Month | mean primary production / $\text{g m}^{-2} \text{d}^{-1}$ |           |            |
|-------|-----------------------------------------------------------|-----------|------------|
|       | eutroph                                                   | mesotroph | oligotroph |
| 1     | 2.15                                                      | 0.56      | 0.26       |
| 2     | 2.15                                                      | 0.57      | 0.25       |
| 3     | 2.21                                                      | 0.56      | 0.24       |
| 4     | 2.13                                                      | 0.57      | 0.22       |
| 5     | 2.11                                                      | 0.59      | 0.23       |
| 6     | 2.30                                                      | 0.60      | 0.24       |
| 7     | 2.32                                                      | 0.61      | 0.24       |
| 8     | 2.28                                                      | 0.61      | 0.23       |
| 9     | 2.15                                                      | 0.59      | 0.24       |
| 10    | 2.10                                                      | 0.58      | 0.25       |
| 11    | 2.18                                                      | 0.56      | 0.25       |
| 12    | 2.14                                                      | 0.57      | 0.26       |
| mean  | 2.18                                                      | 0.58      | 0.24       |

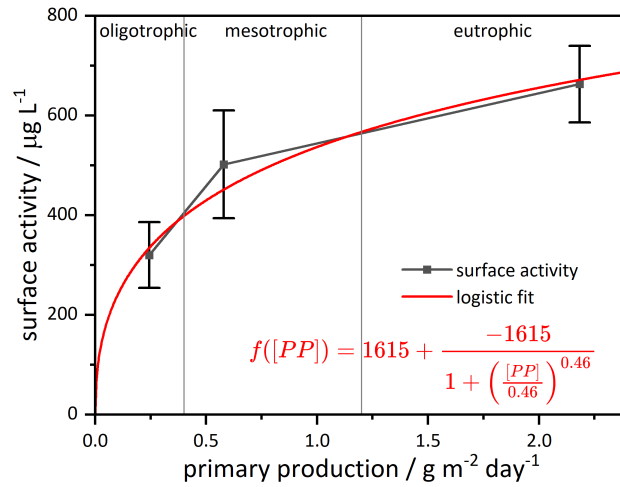

Figure S4: Surface activity - primary production correlation. The error bars represent the 95 % confidence interval in Wurl et al. [5]. The logistic fit has been constrained to the lowest reported value at zero primary productivity and the saturation threshold was set equal to the upper  $2\sigma$  uncertainty bound of the eutrophic data point.

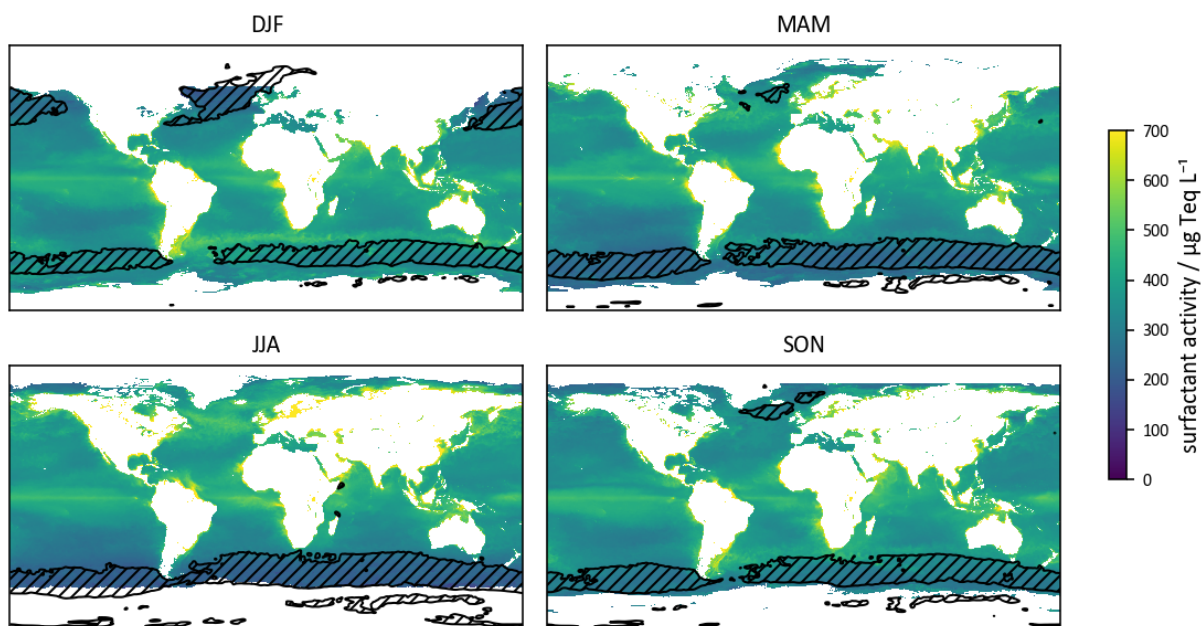

Figure S5: Global maps of surface activity by seasons for 2024, based on a assumed correlation with primary production. The hashed black area shows regimes where the mean wind speed is above  $10 \text{ m s}^{-1}$ .

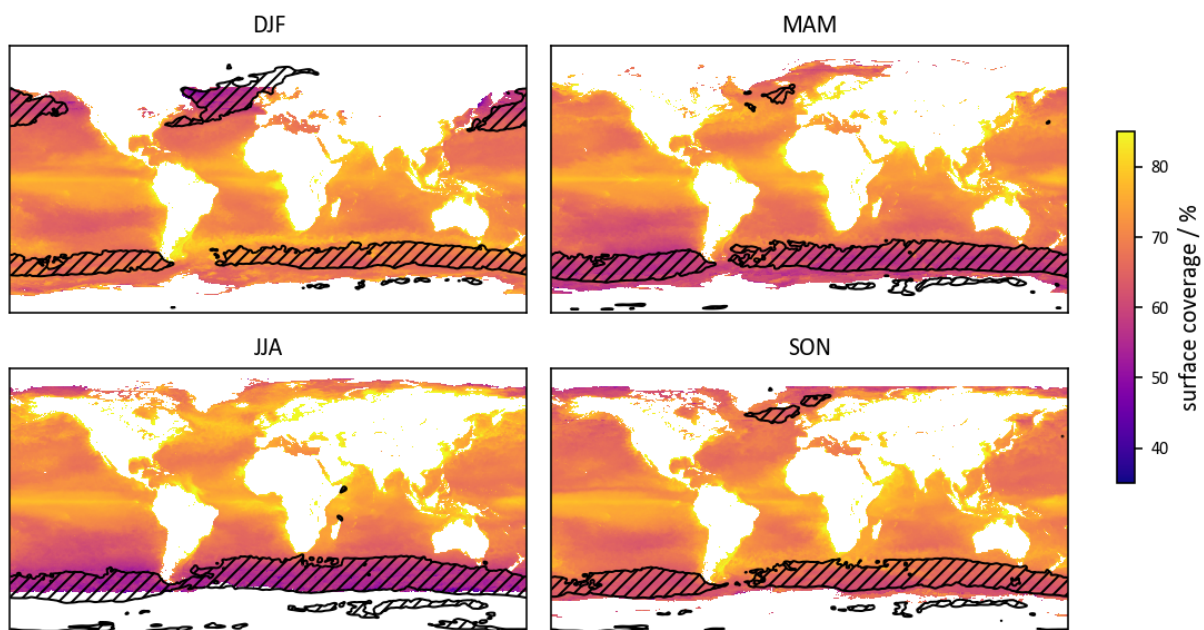

Figure S6: Global maps of surface coverage by seasons for 2024., based on a assumed Langmuir type correlation with surfactant activity data. The hashed black area shows regimes where the mean wind speed is above  $10 \text{ m s}^{-1}$ .



## References

- [1] Bibi, R., Ribas-Ribas, M., Jaeger, L., Lehnert, C., Gassen, L., Cortés, E., Wollschläger, J., Thölen, C., Waska, H., Zöbelein, J., Brinkhoff, T., Athale, I., Röttgers, R., Novak, M., Engel, A., Barthelmeß, T., Karnatz, J., Reinthaler, T., Spriahailo, D., Friedrichs, G., Schäfer, F., and Wurl, O.: Biogeochemical Dynamics of the Sea-Surface Microlayer in a Multidisciplinary Mesocosm Study, *EGUsphere*, 2025, 1–53, <https://doi.org/10.5194/egusphere-2025-1773>, 2025.
- [2] Bibi, R., Ribas-Ribas, M., Jaeger, L., Lehnert, C., Gassen, L., Cortés, E., Wollschläger, J., Thölen, C., Waska, H., Zöbelein, J., Brinkhoff, T., Athale, I., Röttgers, R., Novak, M., Engel, A., Barthelmeß, T., Karnatz, J., Reinthaler, T., Spriahailo, D., Friedrichs, G., Schäfer, F., and Wurl, O.: Physical, chemical, and biogeochemical parameters from a mesocosm experiment at the Sea Surface Facility (SURF), Wilhelmshaven, Germany, spring 2023, <https://doi.org/10.1594/PANGAEA.984101>, 2025.
- [3] Copernicus Marine Service: Global Ocean Colour (Copernicus-GlobColour), Bio-Geo-Chemical, L4 (monthly and interpolated) from Satellite Observations (1997-ongoing), Tech. rep., <https://doi.org/10.48670/moi-00281>, accessed: 2025-10-09, 2024.
- [4] Copernicus Marine Service: Global Ocean Monthly Mean Sea Surface Wind and Stress from Scatterometer and Model, Tech. rep., <https://doi.org/10.48670/moi-00181>, accessed: 2025-09-26, 2024.
- [5] Wurl, O., Wurl, E., Miller, L., Johnson, K., and Vagle, S.: Formation and global distribution of sea-surface microlayers, *Biogeosciences*, 8, 121–135, <https://doi.org/10.5194/bg-8-121-2011>, 2011.
